# Supplementary material
Source: Springer Nature journal article supplement (https://www.springermedizin.de/resource/supplementary/12913_2013_3001_MOESM6_ESM.pdf/9533264)

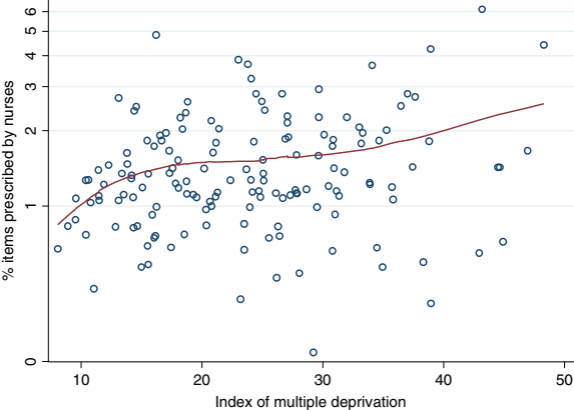

Supplement: MOESM6 [file 9533264]
